# Supplementary material for: Single Nucleotide Polymorphisms of Pfdhfr and Pfdhps Genes: Implications for Malaria Prophylactic Strategies in Maiduguri, Northeast Nigeria
Source: Hindawi journal article supplement (doi:10.1155/2021/8840089), 2021-01-15
Supplement: f1 [file 8840089.f1.zip]

Archive with 2 entries (2 files):
- 8840089.f1/SNPs of Pfdhps and Pfdhfr_JTM_Supplementary Table 1.doc
- 8840089.f1/SNPs of Pfdhps and Pfdhfr_JTM_Supplementary Table 2.doc
